# Supplementary material for: Coexpression of TRPML1 and TRPML2 Mucolipin Channels Affects the Survival of Glioblastoma Patients
Source: MDPI journal article supplement (doi:10.3390/ijms23147741), 2022-07-13
Supplement: s1 [file s1]

## Supplementary files

Table S1. GBM (grade IV) patient characteristics

| Patients characteristics |                                       |              |
|--------------------------|---------------------------------------|--------------|
| N° sample                |                                       | 66           |
| Sex                      |                                       |              |
|                          | Men                                   | 47% (n = 31) |
|                          | Women                                 | 53% (n = 35) |
| Age, years               |                                       |              |
|                          | < 45                                  | 55% (n =36)  |
|                          | >45                                   | 45% (n = 30) |
| GBM MGMT methylation     |                                       |              |
|                          | Non detected                          | 32% (n = 21) |
|                          | Methylated                            | 36% (n = 24) |
|                          | Non methylated                        | 32% (n = 21) |
| GBM Recidivated          |                                       |              |
|                          | Not detected                          | 9% (n = 6)   |
|                          | Not recidivated                       | 14% (n = 9)  |
|                          | Recidivated                           | 77% (n = 51) |
| Adjuvant therapy         |                                       |              |
|                          | No                                    | 13% (n= 9)   |
|                          | STUPP                                 | 56% (n= 37)  |
|                          | Fotemustine                           | 8% (n= 5)    |
|                          | RT                                    | 11% (n= 7)   |
|                          | Other                                 | 12% (n=8)    |
|                          | <i>Temozolomide</i>                   | 38% (3/8)    |
|                          | <i>Fotemustine + Bevacizumab</i>      | 38% (3/8)    |
|                          | <i>Fotemustine + RT</i>               | 12% (1/8)    |
|                          | <i>Fotemustine + RT + Bevacizumab</i> | 12% (1/8)    |

**Table S2.** TRPML1 and TRPML2 gene expression in GBM patients evaluated by qRT-PCR.

| <b>Pz.<br/>N°</b> | <b>TRPML1</b>                      | <b>TRPML2</b> | <b>Pz.<br/>N°</b> | <b>TRPML1</b>                      | <b>TRPML2</b> | <b>Pz.<br/>N°</b> | <b>TRPML1</b>                      | <b>TRPML2</b> |
|-------------------|------------------------------------|---------------|-------------------|------------------------------------|---------------|-------------------|------------------------------------|---------------|
|                   | <b>mRNA expression<sup>a</sup></b> |               |                   | <b>mRNA expression<sup>a</sup></b> |               |                   | <b>mRNA expression<sup>a</sup></b> |               |
| #1                | Low                                | High          | #23               | Neg                                | Neg           | #45               | High                               | Low           |
| #2                | High                               | Low           | #24               | Neg                                | Neg           | #46               | Low                                | High          |
| #3                | High                               | High          | #25               | Neg                                | High          | #47               | High                               | High          |
| #4                | High                               | Low           | #26               | Low                                | Neg           | #48               | Low                                | High          |
| #5                | Neg                                | Neg           | #27               | High                               | Low           | #49               | Low                                | Neg           |
| #6                | High                               | Low           | #28               | Neg                                | High          | #50               | Low                                | Neg           |
| #7                | Neg                                | High          | #29               | Neg                                | Neg           | #51               | Neg                                | High          |
| #8                | High                               | High          | #30               | Neg                                | High          | #52               | Neg                                | High          |
| #9                | High                               | High          | #31               | Neg                                | High          | #53               | Low                                | High          |
| #10               | Neg                                | Neg           | #32               | Low                                | High          | #54               | Low                                | Neg           |
| #11               | Low                                | Neg           | #33               | Low                                | High          | #55               | Neg                                | High          |
| #12               | Neg                                | High          | #34               | Neg                                | High          | #56               | Neg                                | High          |
| #13               | Low                                | Neg           | #35               | Neg                                | Neg           | #57               | Low                                | High          |
| #14               | High                               | Low           | #36               | High                               | Low           | #58               | Neg                                | Neg           |
| #15               | Neg                                | High          | #37               | Neg                                | High          | #59               | High                               | High          |
| #16               | Neg                                | High          | #38               | Neg                                | High          | #60               | High                               | High          |
| #17               | High                               | Low           | #39               | High                               | High          | #61               | Neg                                | High          |
| #18               | Neg                                | High          | #40               | Low                                | High          | #62               | High                               | High          |
| #19               | Neg                                | High          | #41               | High                               | High          | #63               | Neg                                | High          |
| #20               | Low                                | High          | #42               | Neg                                | High          | #64               | High                               | High          |
| #21               | Neg                                | High          | #43               | Neg                                | Neg           | #65               | High                               | High          |
| #22               | Neg                                | Neg           | #44               | High                               | Low           | #66               | High                               | High          |

<sup>a</sup>Relative mRNA expression; Neg: Negative; Low TRPML1  $\leq 1.0$ , Low TRPML2  $\leq 1.8$ ; High TRPML1  $> 1.0$ , High TRPML2  $> 1.8$  evaluated by ROC analysis.

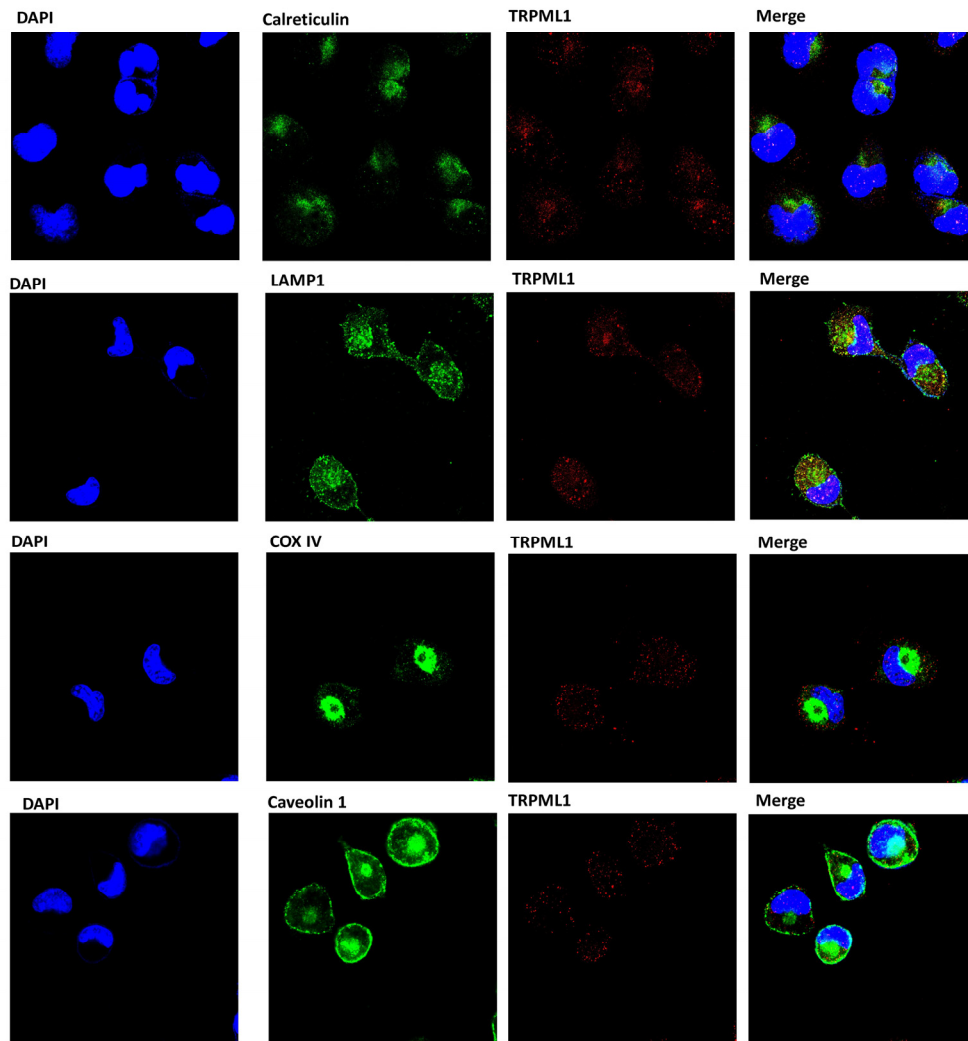

**Figure S1.** Confocal microscopy analysis to evaluate colocalization of TRPML1 different cellular organelles in T98 cells using specific Abs. Endoplasmic reticulum (ER): anti-calreticulin Ab; plasma membrane: anti-caveolin-1 Ab; lysosome: anti-LAMP1; mitochondria: anti-COX IV. 40,6-diamidino-2-phenylindole (DAPI) was used to counterstain nuclei. Magnification 60x.

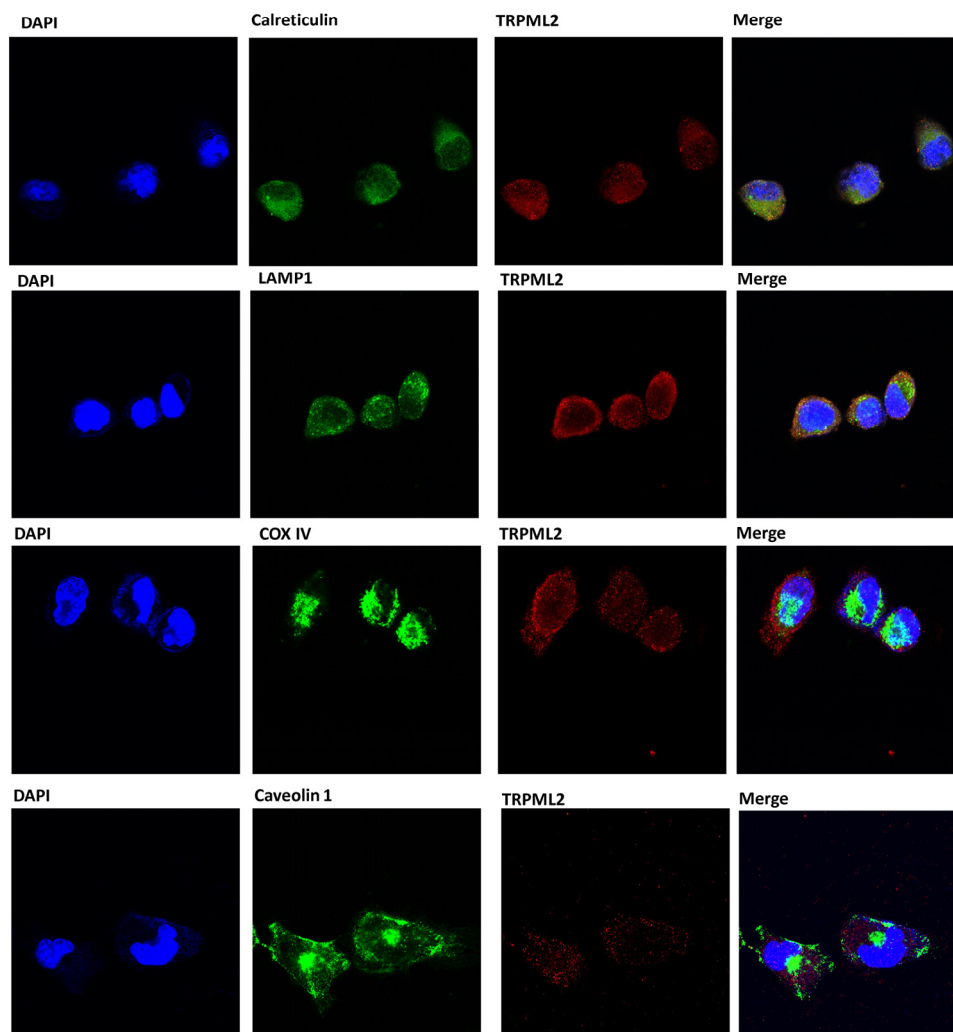

**Figure S2.** Confocal microscopy analysis to evaluate colocalization of TRPML2 different cellular organelles in T98 cells using specific Abs. Endoplasmic reticulum (ER): anti-calreticulin Ab; plasma membrane: anti-caveolin-1 Ab; lysosome: anti-LAMP1; mitochondria: anti-COX IV. 40,6-diamidino-2-phenylindole (DAPI) was used to counterstain nuclei. Magnification 60x.

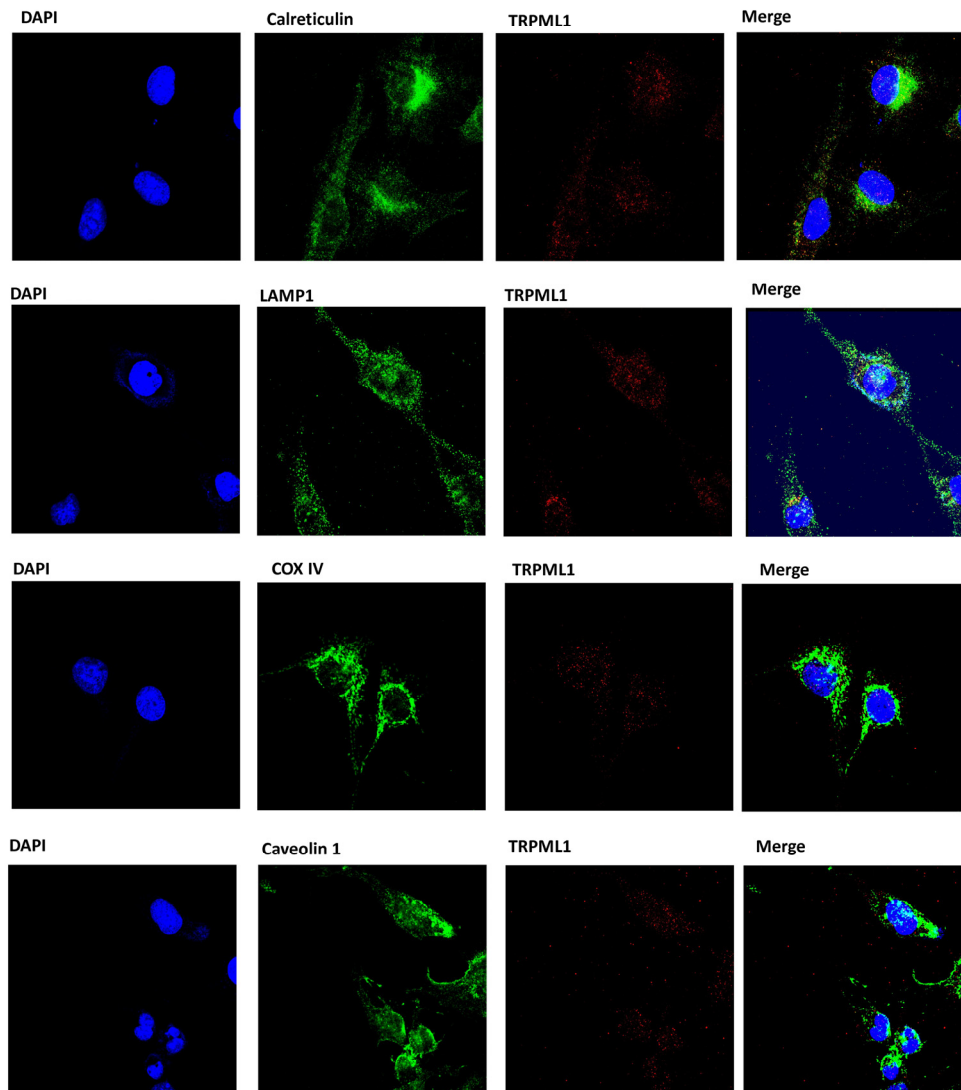

**Figure S3.** Confocal microscopy analysis to evaluate colocalization of TRPML1 different cellular organelles in U251 cells using specific Abs. Endoplasmic reticulum (ER): anti-calreticulin Ab; plasma membrane: anti-caveolin-1 Ab; lysosome: anti-LAMP1; mitochondria: anti-COX IV. 40,6-diamidino-2-phenylindole (DAPI) was used to counterstain nuclei. Magnification 60x.

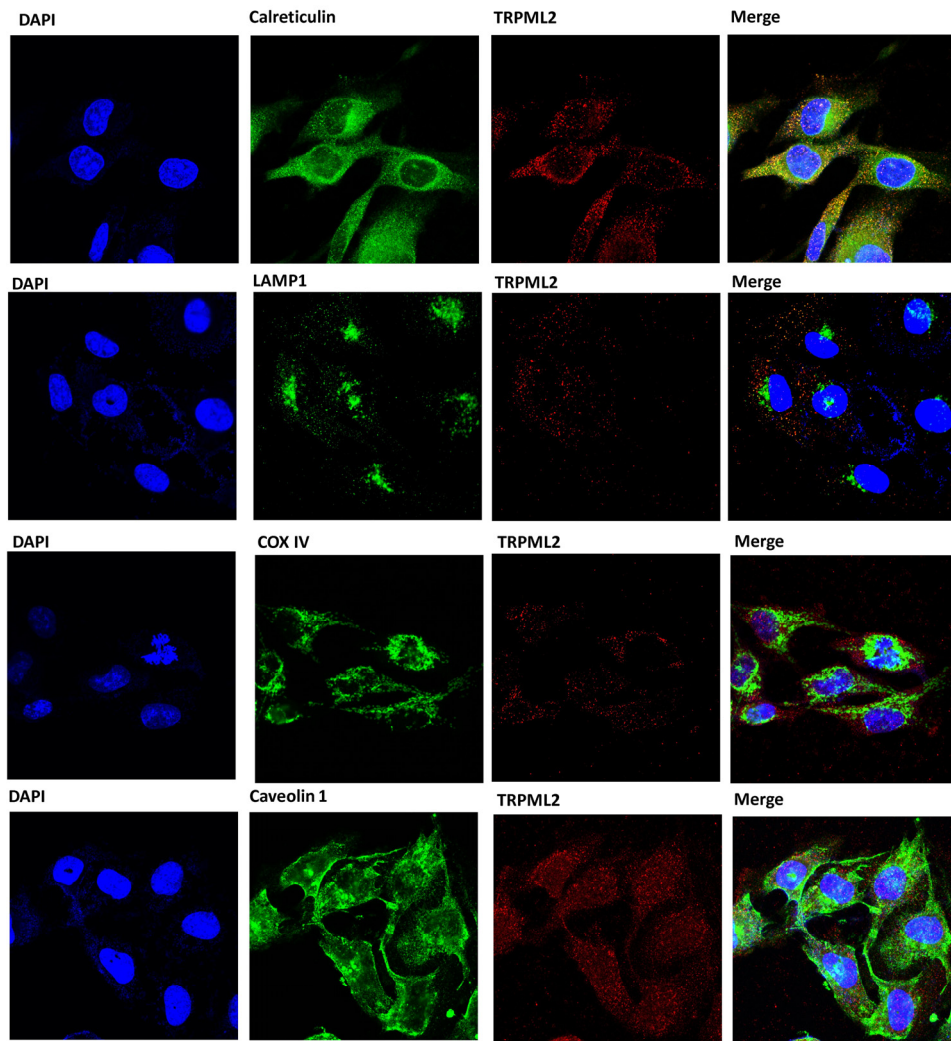

**Figure S4.** Confocal microscopy analysis to evaluate colocalization of TRPML2 different cellular organelles in U251 cells using specific Abs. Endoplasmic reticulum (ER): anti-calreticulin Ab; plasma membrane: anti-caveolin-1 Ab; lysosome: anti-LAMP1; mitochondria: anti-COX IV. 40,6-diamidino-2-phenylindole (DAPI) was used to counterstain nuclei. Magnification 60x.

**Table S3.** Kaplan-Meier p-values.

| <b>P value</b>                                         | <b>TRPML2<sup>low</sup><br/>TRPML1<sup>high</sup></b> | <b>TRPML2<sup>low</sup><br/>TRPML1<sup>neg</sup></b> | <b>TRPML2<sup>high</sup><br/>TRPML1<sup>high</sup></b> | <b>TRPML2<sup>high</sup><br/>TRPML1<sup>low</sup></b> | <b>TRPML2<sup>high</sup><br/>TRPML1<sup>neg</sup></b> | <b>TRPML2<sup>neg</sup><br/>TRPML1<sup>neg</sup></b> |
|--------------------------------------------------------|-------------------------------------------------------|------------------------------------------------------|--------------------------------------------------------|-------------------------------------------------------|-------------------------------------------------------|------------------------------------------------------|
| <b>TRPML2<sup>low</sup><br/>TRPML1<sup>high</sup></b>  |                                                       | 0,0219 *                                             | <0,0001 *                                              | <0,0001 *                                             | <0,0001 *                                             | <0,0001 *                                            |
| <b>TRPML2<sup>low</sup><br/>TRPML1<sup>neg</sup></b>   | 0,0219 *                                              |                                                      | 0,2334                                                 | 0,576                                                 | 0,0088 *                                              | 0,0004 *                                             |
| <b>TRPML2<sup>high</sup><br/>TRPML1<sup>high</sup></b> | <0,0001 *                                             | 0,2334                                               |                                                        | 0,0259 *                                              | 0,0942                                                | <0,0001 *                                            |
| <b>TRPML2<sup>high</sup><br/>TRPML1<sup>low</sup></b>  | <0,0001 *                                             | 0,576                                                | 0,0259 *                                               |                                                       | 0,0019 *                                              | <0,0001 *                                            |
| <b>TRPML2<sup>high</sup><br/>TRPML1<sup>neg</sup></b>  | <0,0001 *                                             | 0,0088 *                                             | 0,0942                                                 | 0,0019 *                                              |                                                       | <0,0001 *                                            |
| <b>TRPML2<sup>neg</sup><br/>TRPML1<sup>neg</sup></b>   | <0,0001 *                                             | 0,0004 *                                             | <0,0001 *                                              | <0,0001 *                                             | <0,0001 *                                             |                                                      |

**Table S4** Pearson's Correlation Coefficient

| <b>Markers</b>         | <b>PCC<br/>T98</b> | <b>PCC<br/>U251</b> |
|------------------------|--------------------|---------------------|
| TRPML2<br>Calreticulin | 0.86               | 0.82                |
| TRPML2<br>Caveolin 1   | 0.23               | 0.26                |
| TRPML2<br>COX IV       | 0.27               | 0.29                |
| TRPML2<br>LAMP1        | 0.81               | 0.86                |
| TRPML1<br>Calreticulin | 0.66               | 0.64                |
| TRPML1<br>Caveolin 1   | 0.25               | 0.19                |
| TRPML1<br>COX IV       | 0.18               | 0.20                |
| TRPML1<br>LAMP1        | 0.67               | 0.65                |

0<PCC<0.3= weak positive correlation; 0.3<PCC<0.5= moderate positive correlation; >0.5 strong positive correlation. PCC= Pearson's Correlation Coefficient
